# Supplementary material
Source: Royal Society of Chemistry journal article supplement (doi:10.1039/d6se00390g)
Supplement: d6se00390g1.pdf [file d6se00390g1.pdf]

*Supporting Information for*

**Structural heterogeneity of castor tissue lignins and their targeted conversion into sustainable aviation fuel precursors**

Xu-Wei Wang,<sup>a</sup> Yu-Xin Zhang,<sup>a</sup> Xu Fu,<sup>a</sup> Qing-Hua Wang,<sup>a</sup> Qiang Wang,<sup>a,\*</sup> Jun-Li Ren,<sup>b</sup> Ling-Ping Xiao,<sup>a,c,\*</sup> and Run-Cang Sun<sup>a</sup>

<sup>a</sup> *Liaoning Key Lab of Lignocellulose Chemistry and BioMaterials, Liaoning Collaborative Innovation Center for Lignocellulosic Biorefinery, College of Light Industry and Chemical Engineering, Dalian Polytechnic University, Dalian 116034, China*

<sup>b</sup> *State Key Laboratory of Advanced Papermaking and Paper-based Materials, School of Light Industry and Engineering, South China University of Technology, Guangzhou 510640, China*

<sup>c</sup> *Instrumental Analysis Center, Dalian Polytechnic University, Dalian 116034, China*

\*Correspondence authors.

E-mail addresses: wangqiang@dlpu.edu.cn (Q. Wang); lpxiao@dlpu.edu.cn (L.-P. Xiao).

Number of pages: 15

Number of tables: 5

Number of figures: 3

## Quantification of Upgraded Cycloalkanes via the ECN Method

For the GC-FID quantification of the upgraded liquid cycloalkanes, n-dodecane was employed as the internal standard (IS). Since the targeted products are fully deoxygenated hydrocarbons, their effective carbon numbers (ECN) are equivalent to their actual carbon numbers. The mole ( $n_{\text{monomer}}$ ) and weight ( $W_{\text{monomer}}$ ) of each specific product were calculated using the following equations:

$$n_{\text{IS}} = \frac{W_{\text{IS in sample}}}{M_{\text{WIS}}}$$
$$n_{\text{monomer}} = n_{\text{IS}} \times \frac{A_{\text{monomer in sample}}}{A_{\text{IS in sample}}} \times \frac{\text{ECN}_{\text{IS}}}{\text{ECN}_{\text{monomer}}}$$
$$W_{\text{monomer}} = n_{\text{monomer}} \times M_{\text{Wmonomer}}$$

In these equations,

$W_{\text{IS in sample}}$  (mg): the weight of n-dodecane used as an internal standard in each analyzed sample;

$M_{\text{WIS}}$  (mg/mmol): the molecular weight of n-dodecane (170 mg/mmol);

$n_{\text{IS}}$  (mmol): the mole of n-dodecane in each analyzed sample;

$n_{\text{monomer}}$  (mmol): the mole of monomer in each analyzed sample;

$A_{\text{monomer in sample}}$ : the peak area of monomer in the GC-FID chromatogram;

$A_{\text{IS in sample}}$ : the peak area of n-dodecane in the GC-FID chromatogram;

$\text{ECN}_{\text{IS}}$ : the effective carbon number of n-dodecane;

$\text{ECN}_{\text{monomer}}$ : the effective carbon number of lignin monomer;

$W_{\text{monomer}}$  (mg): the weight of monomer in each analyzed sample;

## FT-IR analysis

FT-IR spectra of lignin and lignin oil were recorded using a Perkin-Elmer spectrophotometer.

The spectra of powdered lignin supported by KBr pellets were recorded in the range of 400 to 4000  $\text{cm}^{-1}$  with 32 scans averaged at 4.0  $\text{cm}^{-1}$  resolution at room temperature.

### GPC analysis

Gel permeation chromatography (GPC) analysis was conducted using a Waters HPLC system (Sunnyvale, CA) comprising an isocratic pump (Waters 1515), an autosampler (Waters 717), and a dual-wavelength UV detector (Waters 2487). Separation was achieved on an Agilent PLgel column (3  $\mu\text{m}$ , 100  $\text{\AA}$ , 300  $\times$  7.5 mm) with tetrahydrofuran (THF) as the mobile phase at a flow rate of 1.0 mL/min and a column temperature of 30  $^{\circ}\text{C}$ . Prior to analysis, lignin samples (2 mg) were dissolved in 1 mL of THF, filtered through a 0.45  $\mu\text{m}$  PTFE membrane, and injected (20.0  $\mu\text{L}$ ) into the syringe. Detection was performed at 280 nm using the UV detector. Seven GPC polystyrene standards (124~26520 g/mol) purchased from Agilent (Agilent Technologies, Inc., Santa Clara, CA) were used for calibration. To enhance solubility and accuracy in GPC measurements, lignin was acetylated before analysis.<sup>1-2</sup> Briefly, 20 mg of lignin was reacted with 0.5 mL of pyridine and 0.5 mL acetic anhydride at 80  $^{\circ}\text{C}$  for 4 h. The product was precipitated in ice water (100 mL), centrifuged, and washed repeatedly to remove residual pyridine. The purified acetylated lignin was lyophilized and subsequently analyzed via GPC as described above.

### GC and GC-MS analysis

GC and GC-MS analyses were carried out on a Shimadzu Model 2010 plus equipped with a HP-5 column (30 m  $\times$  0.25 mm  $\times$  0.25  $\mu\text{m}$ ) using a flame ionization detector (FID) and a Shimadzu GC-MS-QP 2010 pro equipped with a HP-5 MS (30 m  $\times$  0.25 mm  $\times$  0.25  $\mu\text{m}$ ) column, respectively. The injection temperature was 250  $^{\circ}\text{C}$ . The column temperature program was: 50  $^{\circ}\text{C}$  (3 min), 8  $^{\circ}\text{C}/\text{min}$  to 280  $^{\circ}\text{C}$  (5 min). The detection temperature was 200  $^{\circ}\text{C}$  for FID.<sup>3</sup> To ensure clarity and comparability, the monomer yield was calculated based on the mass of the initial EMAL substrate. The specific calculation formula is as follows:

$$\begin{aligned} \text{Monomer yield (wt\%)} \\ &= \frac{\text{Mass (total monomers)}}{\text{Mass (initial lignin)}} \times 100 \end{aligned} \quad (\text{S4})$$

where Mass (total monomers) is the quantified mass of the phenolic monomers in the liquid product, and Mass (initial lignin) is the exact initial weight of the EMAL loaded into the reactor.

## **TG Analysis**

The thermal stability of the lignin samples was evaluated using a Q500 thermogravimetric analyzer (TA Instruments). In TG measurement, at a heating rate of 10 °C/min, approximately 10 mg of sample was placed in a small crucible under a nitrogen atmosphere at a temperature between 25 and 800 °C.<sup>4</sup>

**Table S1** The chemical composition of Castor (*Ricinus communis* L.).

| Sample   | Ash (wt%)    | lignin content (wt%) |             | cellulose content (wt%) | hemicellulose content (wt%) |             |             |
|----------|--------------|----------------------|-------------|-------------------------|-----------------------------|-------------|-------------|
|          |              | KL                   | ASL         | Glucose                 | Xylose                      | Arabinose   | Galactose   |
| Endocarp | 2.54 ± 0.08  | 64.02 ± 1.15         | 2.02 ± 0.03 | 13.29 ± 0.02            | 10.27 ± 0.27                | 0.64 ± 0.05 | 1.10 ± 0.03 |
| Epicarp  | 10.10 ± 0.02 | 13.88 ± 0.17         | 3.51 ± 0.08 | 37.70 ± 0.58            | 24.88 ± 0.47                | 0.72 ± 0.02 | 1.34 ± 0.03 |
| Stalk    | 2.87 ± 0.12  | 18.69 ± 0.22         | 2.15 ± 0.16 | 45.78 ± 0.38            | 18.86 ± 0.43                | 0.64 ± 0.03 | 1.36 ± 0.01 |

**Table S2** NMR data for the signal assignments for EMAL, LCC and lignin oils samples from various parts of castor in DMSO-*d*<sub>6</sub>.

| Label                           | $\delta_C/\delta_H$ (ppm) | Assignment                                                                            |
|---------------------------------|---------------------------|---------------------------------------------------------------------------------------|
| D <sub>β</sub>                  | 53.3/3.46                 | C <sub>β</sub> -H <sub>β</sub> in β-5' phenylcoumarane substructures (D)              |
| B <sub>β</sub>                  | 53.5/3.06                 | C <sub>β</sub> -H <sub>β</sub> in β-β' resinol substructures (B)                      |
| ArOMe                           | 55.6/3.73                 | C-H in methoxyls                                                                      |
| It <sub>γ</sub> /A <sub>γ</sub> | 58.0-60.0/3.35-3.65       | C <sub>γ</sub> -H <sub>γ</sub> in benzodioxane (I) and β-O-4' substructures (A)       |
| Ic <sub>γ</sub>                 | 58.4/3.35                 | C <sub>γ</sub> -H <sub>γ</sub> in cis-benzodioxane substructures (I)                  |
| E <sub>γ</sub>                  | 61.4/4.10                 | C <sub>γ</sub> -H <sub>γ</sub> in cinnamyl alcohol end-units (E)                      |
| D <sub>γ</sub>                  | 62.5/3.73                 | C <sub>γ</sub> -H <sub>γ</sub> in β-5' phenylcoumaran substructures (D)               |
| X <sub>5</sub>                  | 62.6/3.40-3.72            | C <sub>5</sub> -H <sub>5</sub> in β-D-xylopyranoside (X)                              |
| Est <sub>γ</sub>                | 63.2/4.33                 | C <sub>γ</sub> -H <sub>γ</sub> in γ-ester lignin-carbohydrate complex structures      |
| B <sub>γ</sub>                  | 71.0/3.82-4.18            | C <sub>γ</sub> -H <sub>γ</sub> in β-β' resinol substructures (B)                      |
| A <sub>α</sub>                  | 71.8/4.86                 | C <sub>α</sub> -H <sub>α</sub> in β-O-4' substructures (A)                            |
| X <sub>2</sub>                  | 72.5/3.02                 | C <sub>2</sub> -H <sub>2</sub> in β-D-xylopyranoside (X)                              |
| X <sub>2</sub> <sub>2</sub>     | 73.2/4.49                 | C <sub>2</sub> -H <sub>2</sub> in 2-O-acetyl-β-D-xylopyranoside (X)                   |
| X <sub>3</sub>                  | 73.7/3.22                 | C <sub>3</sub> -H <sub>3</sub> in β-D-xylopyranoside (X)                              |
| X <sub>3</sub> <sub>3</sub>     | 74.7/4.80                 | C <sub>3</sub> -H <sub>3</sub> in 3-O-acetyl-β-D-xylopyranoside (X)                   |
| X <sub>4</sub>                  | 75.4/3.60                 | C <sub>4</sub> -H <sub>4</sub> in β-D-xylopyranoside (X)                              |
| Ic <sub>α</sub>                 | 74.8/5.18                 | C <sub>α</sub> -H <sub>α</sub> in cis-benzodioxane substructures (I)                  |
| It <sub>α</sub>                 | 75.4/4.83                 | C <sub>α</sub> -H <sub>α</sub> in trans-benzodioxane substructures (I)                |
| Ic <sub>β</sub>                 | 76.9/4.38                 | C <sub>β</sub> -H <sub>β</sub> in cis-benzodioxane substructures (I)                  |
| It <sub>β</sub>                 | 77.9/4.06                 | C <sub>β</sub> -H <sub>β</sub> in trans-benzodioxane substructures (I)                |
| U <sub>4</sub>                  | 81.1/3.10                 | C <sub>4</sub> -H <sub>4</sub> in 4-O-methyl-α-D-GlcUA (U)                            |
| BE <sub>1α</sub>                | 81.3/4.65                 | C <sub>α</sub> -H <sub>α</sub> in benzyl ether lignin-carbohydrate complex structures |
| BE <sub>2α</sub>                | 81.3/5.07                 | C <sub>α</sub> -H <sub>α</sub> in benzyl ether lignin-carbohydrate complex structures |
| A <sub>β(G/H)</sub>             | 83.9/4.29                 | C <sub>β</sub> -H <sub>β</sub> in β-O-4' substructures linked to G and H units (A)    |
| B <sub>α</sub>                  | 84.8/4.65                 | C <sub>α</sub> -H <sub>α</sub> in β-β' resinol substructures (B)                      |
| A <sub>β(S)</sub>               | 85.9/4.12                 | C <sub>β</sub> -H <sub>β</sub> in β-O-4' substructures linked to S units (A)          |
| D <sub>α</sub>                  | 86.8/5.46                 | C <sub>α</sub> -H <sub>α</sub> in β-5' phenylcoumaran substructures (D)               |
| αX <sub>1(R)</sub>              | 92.2/4.88                 | C <sub>1</sub> -H <sub>1</sub> in (1→4)-α-D-xylopyranoside (R)                        |
| U <sub>1</sub>                  | 97.2/5.18                 | C <sub>1</sub> -H <sub>1</sub> in 4-O-methyl-α-D-GlcUA (U)                            |

|                                                  |                  |                                                                      |
|--------------------------------------------------|------------------|----------------------------------------------------------------------|
| $\beta X_{1(R)}$                                 | 97.4/4.26        | $C_1-H_1$ in (1 $\rightarrow$ 4)- $\beta$ -D-xylopyranoside (R)      |
| PhGlc <sub>1</sub>                               | 98.4/4.90        | $C_1-H_1$ in phenyl glycoside linkages                               |
| R <sub>1</sub>                                   | 98.8/5.12        | $C_1-H_1$ in (1 $\rightarrow$ 2)- $\alpha$ -L-rhamnopyranoside (R)   |
| X23 <sub>1</sub>                                 | 98.9/4.71        | $C_1-H_1$ in 2,3- <i>O</i> -acetyl- $\beta$ -D-xylopyranoside (X)    |
| X2 <sub>1</sub>                                  | 99.4/4.52        | $C_1-H_1$ in 2- <i>O</i> -acetyl- $\beta$ -D-xylopyranoside (X)      |
| PhGlc <sub>2</sub>                               | 100.6/4.65       | $C_2-H_2$ in phenyl glycoside linkages                               |
| PhGlc <sub>3</sub>                               | 101.5/4.79       | $C_3-H_3$ in phenyl glycoside linkages                               |
| X3 <sub>1</sub>                                  | 101.6/4.32       | $C_1-H_1$ in 3- <i>O</i> -acetyl- $\beta$ -D-xylopyranoside (X)      |
| X <sub>1</sub> /Glc <sub>1</sub>                 | 103.2/4.20       | $C_1-H_1$ in $\beta$ -D-xylopyranoside/ $\beta$ -D-glucopyranoside   |
| S <sub>2/6</sub>                                 | 103.8/6.71       | $C_{2/6}-H_{2/6}$ in etherified syringyl units (S)                   |
| S' <sub>2/6</sub>                                | 106.2/7.23–7.07  | $C_{2/6}-H_{2/6}$ in oxidized ( $C_\alpha=O$ ) syringyl units (S')   |
| G <sub>2</sub>                                   | 110.9/6.98       | $C_2-H_2$ in guaiacyl units (G)                                      |
| G' <sub>2</sub>                                  | 111.4/7.51       | $C_2-H_2$ in oxidized ( $C_\alpha=O$ ) guaiacyl units (G')           |
| C <sub>2</sub> , C <sub>5</sub> , C <sub>6</sub> | 112.0–120.0/7.20 | $C_2-H_2$ , $C_5-H_5$ , $C_6-H_6$ , in etherified catechyl units (C) |
| G <sub>5</sub>                                   | 114.9/6.77       | $C_2-H_2$ in guaiacyl units (G)                                      |
| H <sub>3/5</sub>                                 | 114.9/6.77       | $C_{3/5}-H_{3/5}$ in <i>p</i> -hydroxyphenyl units (H)               |
| FA <sub>8</sub>                                  | 114.8/6.49       | $C_8/H_8$ in ferulates (FA)                                          |
| PB <sub>3/5</sub>                                | 114.9/6.77       | $C_{3/5}-H_{3/5}$ in <i>p</i> -hydroxybenzoate substructures (PB)    |
| <i>p</i> CA <sub>3/5</sub>                       | 115.5/6.77       | $C_3/H_3$ and $C_5/H_5$ in <i>p</i> -coumarates ( <i>p</i> CA)       |
| G <sub>6</sub>                                   | 119.0/6.80       | $C_6-H_6$ in guaiacyl units (G)                                      |
| J <sub><math>\beta</math></sub>                  | 126.1/6.76       | $C_\beta-H_\beta$ in cinnamaldehyde end groups (J)                   |
| H <sub>2/6</sub>                                 | 127.9/7.19       | $C_{2/6}-H_{2/6}$ in <i>p</i> -hydroxyphenyl units (H)               |
| E <sub><math>\alpha</math></sub>                 | 128.4/6.44       | $C_\alpha-H_\alpha$ in cinnamyl alcohol end-units (E)                |
| E <sub><math>\beta</math></sub>                  | 128.7/6.20       | $C_\beta-H_\beta$ in cinnamyl alcohol end-units (E)                  |
| <i>p</i> CA <sub>2/6</sub>                       | 129.9/7.45       | $C_2/H_2$ and $C_6/H_6$ in <i>p</i> -coumarates ( <i>p</i> CA)       |
| PB <sub>2/6</sub>                                | 131.2/7.67       | $C_{2/6}-H_{2/6}$ in <i>p</i> -hydroxybenzoate substructures (PB)    |
| <i>p</i> CA <sub>7</sub> /FA                     | 144.7/7.58       | $C_7/H_7$ in <i>p</i> -coumarates ( <i>p</i> CA) and ferulates (FA)  |
| 7                                                |                  |                                                                      |
| J <sub><math>\alpha</math></sub>                 | 153.5/7.60       | $C_\alpha-H_\alpha$ in cinnamaldehyde end groups (J)                 |
| C3 <sub><math>\alpha</math></sub>                | 38.2/2.61        | $C_\alpha-H_\alpha$ in compound C3                                   |
| C3 <sub><math>\beta</math></sub>                 | 24.1/1.64        | $C_\beta-H_\beta$ in compound C3                                     |
| C3 <sub><math>\gamma</math></sub>                | 13.7/0.94        | $C_\gamma-H_\gamma$ in compound C3                                   |
| C4 <sub><math>\alpha</math></sub>                | 131.5/6.21       | $C_\alpha-H_\alpha$ in compound C4                                   |
| C4 <sub><math>\beta</math></sub>                 | 121.7/5.94       | $C_\beta-H_\beta$ in compound C4                                     |
| C4 <sub><math>\gamma</math></sub>                | 18.1/1.80        | $C_\gamma-H_\gamma$ in compound C4                                   |
| G/S2 <sub><math>\alpha</math></sub>              | 28.3/2.48        | $C_\alpha-H_\alpha$ in compounds G2 and S2                           |

---

|                   |           |                                                       |
|-------------------|-----------|-------------------------------------------------------|
| G/S2 <sub>β</sub> | 16.4/1.14 | C <sub>β</sub> -H <sub>β</sub> in compounds G2 and S2 |
| G/S3 <sub>α</sub> | 37.5/2.43 | C <sub>α</sub> -H <sub>α</sub> in compounds G3 and S3 |
| G/S3 <sub>β</sub> | 24.9/1.55 | C <sub>β</sub> -H <sub>β</sub> in compounds G3 and S3 |
| G/S3 <sub>γ</sub> | 13.9/0.87 | C <sub>γ</sub> -H <sub>γ</sub> in compounds G3 and S3 |
| G/S4 <sub>α</sub> | 31.1/2.51 | C <sub>α</sub> -H <sub>α</sub> in compounds G4 and S4 |
| G/S4 <sub>β</sub> | 34.4/1.70 | C <sub>β</sub> -H <sub>β</sub> in compounds G4 and S4 |
| G/S4 <sub>γ</sub> | 60.6/3.43 | C <sub>γ</sub> -H <sub>γ</sub> in compounds G4 and S4 |
| H1 <sub>α</sub>   | 19.7/2.19 | C <sub>α</sub> -H <sub>α</sub> in compounds H1        |
| H2 <sub>α</sub>   | 29.3/2.71 | C <sub>α</sub> -H <sub>α</sub> in compounds H2        |
| H2 <sub>β</sub>   | 35.5/1.52 | C <sub>β</sub> -H <sub>β</sub> in compounds H2        |

---

**Table S3** The weight-average ( $M_w$ ) and number-average ( $M_n$ ) molecular weights and the polydispersity ( $M_w/M_n = \text{PDI}$ ) of EMAL, lignin oil, LCC and HDO products.

| Sample              | $M_w$ | $M_n$ | PDI  |
|---------------------|-------|-------|------|
| Endocarp EMAL       | 3485  | 1660  | 2.10 |
| Epicarp EMAL        | 9390  | 1895  | 4.96 |
| Stalk EMAL          | 10295 | 2210  | 4.66 |
| Endocarp lignin oil | 230   | 83    | 2.77 |
| Epicarp lignin oil  | 465   | 154   | 3.02 |
| Stalk lignin oil    | 395   | 149   | 2.65 |
| Endocarp LCC        | 1450  | 890   | 1.63 |
| Epicarp LCC         | 2045  | 1025  | 2.00 |
| Stalk LCC           | 3170  | 1020  | 3.11 |
| Endocarp            | 155   | 145   | 1.07 |
| Epicarp             | 150   | 140   | 1.11 |
| Stalk               | 150   | 140   | 1.11 |

**Table S4** The hydroxyl group contents of various EMAL samples (millimoles per gram).

| EMAL Samples | Aliphatic OH | Phenolic             |                           |                      |                           |                           | <i>p</i> CA-OH | Catechol OH | Carboxylic Group | Total Phenolic OH |
|--------------|--------------|----------------------|---------------------------|----------------------|---------------------------|---------------------------|----------------|-------------|------------------|-------------------|
|              |              | Cond. G <sup>a</sup> | Non. Cond. G <sup>a</sup> | Cond. S <sup>a</sup> | Non. Cond. S <sup>a</sup> | Non. Cond. H <sup>a</sup> |                |             |                  |                   |
| Endocarp     | 3.43         | – <sup>b</sup>       | –                         | –                    | –                         | –                         | –              | 3.27        | 0.10             | 3.27              |
| Epicarp      | 4.37         | 0.06                 | 0.31                      | 0.03                 | 0.09                      | 0.60                      | 0.31           | –           | 0.07             | 1.40              |
| Stalk        | 4.50         | 0.17                 | 0.49                      | 0.05                 | 0.14                      | 0.03                      | –              | –           | 0.06             | 0.88              |

<sup>a</sup> “Cond. and Non. Cond.” represents condensed phenolic units and non-condensed phenolic units, respectively.

<sup>b</sup> Signifies not detected.

**Table S5** Typical chemical shifts and integration regions for EMAL samples from various parts of castor in the  $^{31}\text{P}$  NMR spectra.

| Structure                               | $\delta$ (ppm) |
|-----------------------------------------|----------------|
| Aliphatic OH                            | 145.40–150.00  |
| Condensed guaiacyl OH                   | 141.42–142.17  |
| Noncondensed guaiacyl OH                | 138.79–140.17  |
| Condensed syringyl OH                   | 143.20–144.50  |
| Noncondensed syringyl OH                | 142.17–143.20  |
| <i>p</i> -coumarate ( <i>p</i> CA) OH   | 136.70–137.80  |
| Noncondensed <i>p</i> -hydroxyphenyl OH | 137.10–138.40  |
| Catechol OH                             | 138.0–140.0    |
| Carboxylic group                        | 134.2–135.5    |

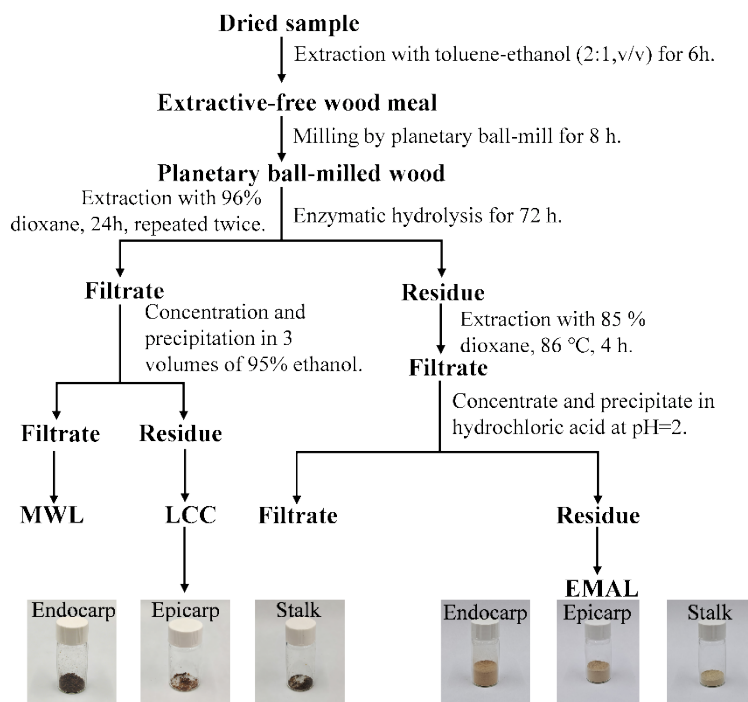

**Fig. S1** Extraction process of EMAL and LCC fractions.

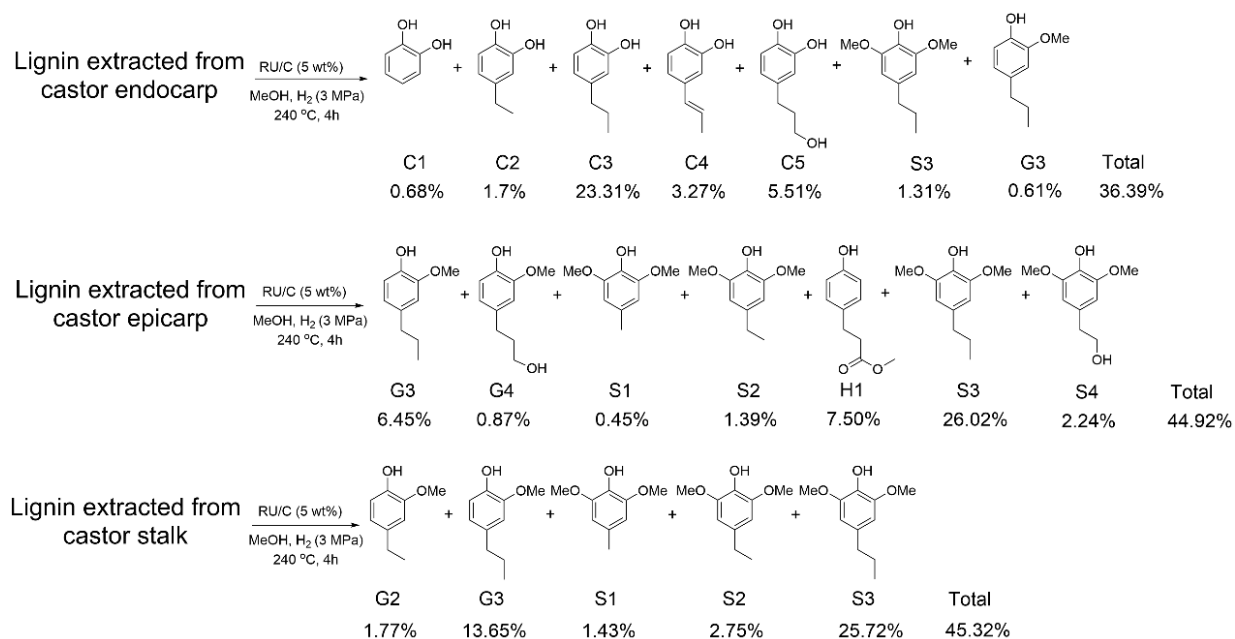

**Fig. S2** Monomer yields from the hydrogenolysis of EMAL samples from three different parts of Castor.

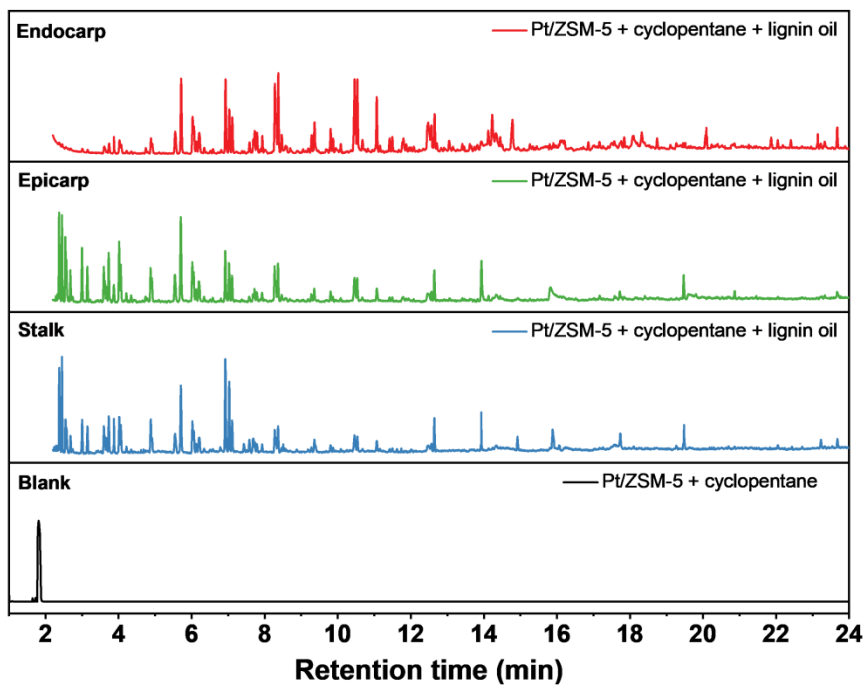

**Fig. S3** GC chromatograms of the reaction mixtures from the HDO of castor-derived lignin oil (endocarp, epicarp, and stalk) and the blank experiment (Pt/ZSM-5 + cyclopentane) under identical reaction conditions.

## References

- 1 D. J. McClelland, A. H. Motagamwala, Y. Li, M. R. Rover, A. M. Wittrig, C. Wu, J. S. Buchanan, R. C. Brown, J. Ralph, J. A. Dumesic and G. W. Huber, *Green Chem.*, 2017, **19**, 1378-1389. DOI: 10.1039/c6gc03515a.
- 2 M. M. Abu-Omar, K. Barta, G. T. Beckham, J. S. Luterbacher, J. Ralph, R. Rinaldi, Y. Román-Leshkov, J. S. M. Samec, B. F. Sels and F. Wang, *Energy Environ. Sci.*, 2020, **14**, 262-292. DOI: 10.1039/d0ee02870c.
- 3 Y. Liao, S.-F. Koelewijn, G. Van den Bossche, J. Van Aelst, S. Van den Bosch, T. Renders, K. Navare, T. Nicolai, K. Van Aelst, M. Maesen, H. Matsushima, J. M. Thevelein, K. Van Acker, B. Lagrain, D. Verboekend and B. F. Sels, *Science*, 2020, **367**, 1385-1390. DOI: 10.1126/science.aau1567.
- 4 X. Huang, H. Yin, H. Zhang, N. Mei and L. Mu, *Energy*, 2022, **259**, 125062. DOI: 10.1016/j.energy.2022.125062.
